# Supplementary material for: Placebo response and effect in randomized clinical trials: meta-research with focus on contextual effects
Source: Springer Nature journal article supplement (doi:10.1186/s13063-021-05454-8), 2021-07-26

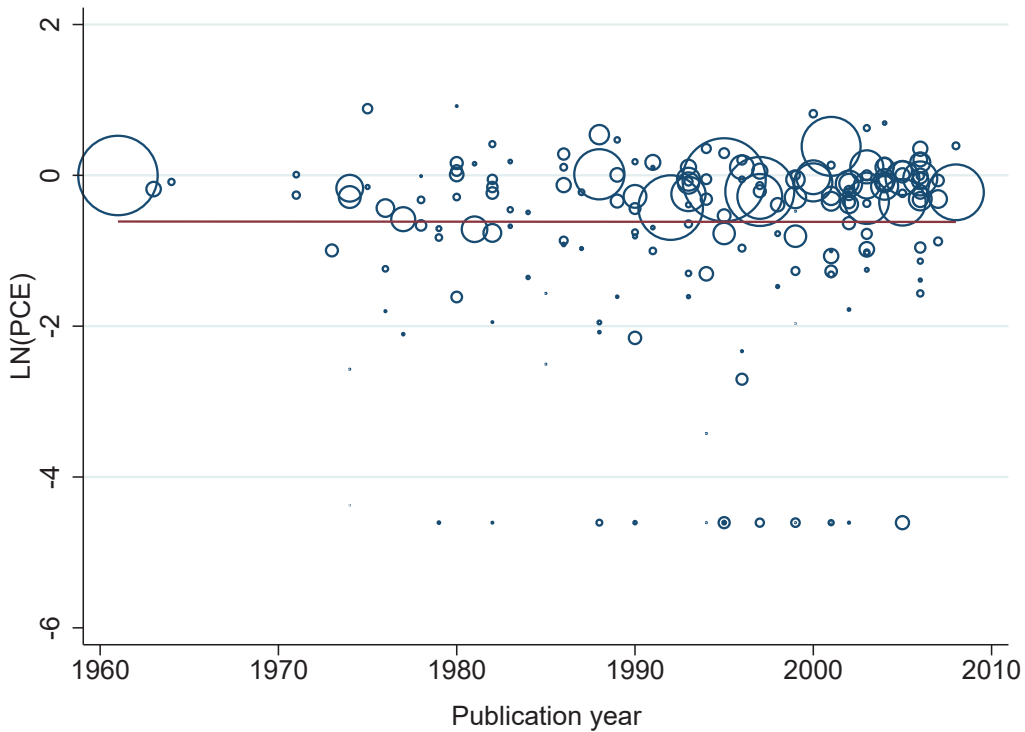

Supplement: MOESM5 [file 19392494]
