# Supplementary material for: Placebo response and effect in randomized clinical trials: meta-research with focus on contextual effects
Source: Springer Nature journal article supplement (doi:10.1186/s13063-021-05454-8), 2021-07-26

Funnel plot with pseudo 95% confidence limits

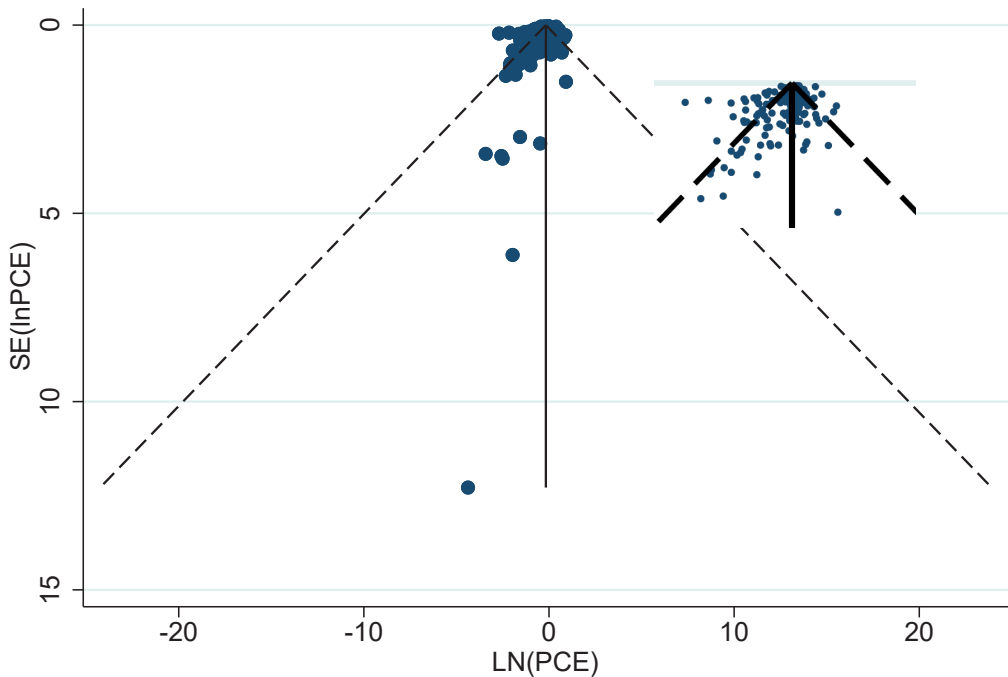

Supplement: MOESM7 [file 19392494]
